# Supplementary material for: Computational Comparative Study of Tuberculosis Proteomes Using a Model Learned from Signal Peptide Structures
Source: PLoS One. 2012 Apr 9;7(4):e35018. doi: 10.1371/journal.pone.0035018 (PMC3322152; doi:10.1371/journal.pone.0035018)
Supplement: Dataset S3 — Accession IDs of proteins predicted as signal peptide proteins in the seven selected tuberculosis strains. (XLS) [file pone.0035018.s004.xls]

## Sheet: 工作表1
accession IDs for proteins predicted as signal peptide protein
MYCTU	MYCTA	MYCTF	MYCTK	MYCBO	MYCBP	MYCBT
P0A4V2	A5U3Q3	A5WI70	C6DL04	P0C2T1	A1KQD8	C1AM21
P0C5B9	A5U173	A5WI93	C6DL35	P0C2T2	A1KJU9	C1AM23
Q50906	A5U175	A5WIB4	C6DL40	O30620	P80069	C1AMU9
P65209	A5U204	A5WIB6	C6DL51	P65210	A1KHG8	C1AQK4
P65211	A5U493	A5WIH1	C6DL69	P65212	A1KHH0	C1AQC3
P63691	A5U4X2	A5WII0	C6DL72	P63692	A1KI93	C1AFY9
P0C5C1	A5U4N6	A5WIM4	C6DL84	P0A5I7	A1KKY1	C1AFW6
P63751	A5U8T5	A5WIM5	C6DL95	P63752	A1KKQ0	C1AQ13
Q10397	A5U6W5	A5WIM6	C6DLC8	Q7VEN6	A1KMV1	C1AML8
P63879	A5TZK3	A5WIM7	C6DLD0	P63880	A1KFU9	C1AER7
P63881	A5U6K4	A5WIM8	C6DLE1	P63882	A1KNP6	C1AEV2
O53696	A5U7Y7	A5WIP7	C6DLH9	P68434	A1KMJ5	C1AEY2
O53946	A5U6W7	A5WIQ8	C6DLI6	P0A5P5	A1KNZ9	C1AEY5
P68435	A5U4C0	A5WIQ9	C6DLK7	P63457	A1KMV3	C1AF11
P0A5P4	A5U1S2	A5WIR2	C6DLM2	P0A4V9	A1KKE0	C1AF12
P63456	A5TY86	A5WIT2	C6DLM3	P0A5A0	A1KI12	C1AF13
P0C5C0	A5TYB1	A5WIT3	C6DLN1	P0C2T3	A1KEI4	C1AF20
P0A599	A5TYC1	A5WIT5	C6DLN5	P65225	A1KEK8	C1AF31
P0A5P6	A5TYD4	A5WIU1	C6DLN9	Q7VER1	A1KEL8	C1AF54
P65224	A5TYJ1	A5WIU2	C6DLX0	P65301	A1KEN1	C1AF56
P95010	A5TYK0	A5WIU4	C6DLX3	Q7VEM3	A1KET7	C1AF57
P95009	A5TYP4	A5WIY9	C6DM05	P65303	A1KEU6	C1AF66
Q10688	A5TYP5	A5WJ02	C6DM09	P65305	A1KEY9	C1AF68
P65300	A5TYP6	A5WJ03	C6DM10	P65307	A1KEZ0	C1AF69
Q50693	A5TYP7	A5WJ18	C6DM14	Q7TWW9	A1KEZ1	C1AF70
Q50675	A5TYP8	A5WJ24	C6DM15	P65309	A1KEZ2	C1AF79
P65302	A5TYS7	A5WJ29	C6DM17	P0A5J1	A1KEZ3	C1AF80
P65304	A5TYS8	A5WJ40	C6DM55	Q7U0V0	A1KF12	C1AFB0
P65306	A5TYT1	A5WJ53	C6DM84	P65311	A1KF22	C1AFC7
O05889	A5TYV1	A5WJ90	C6DM85	Q7U094	A1KF23	C1AFD1
P65308	A5TYV2	A5WJ92	C6DM95	Q7U093	A1KF26	C1AFD5
P0A5J0	A5TYV4	A5WJA6	C6DM97	P65313	A1KF46	C1AFE3
P96384	A5TYW0	A5WJA7	C6DMA7	P65315	A1KF47	C1AFE4
P65310	A5TYW1	A5WJA8	C6DMA8	P0A5I9	A1KF49	C1AFF9
O50422	A5TYW3	A5WJB1	C6DMB0	P65317	A1KF55	C1AFI0
Q11049	A5TZ18	A5WJB2	C6DMD2	P65319	A1KF56	C1AFI8
Q11045	A5TZ19	A5WJB5	C6DME4	P59987	A1KF58	C1AFK2
P65312	A5TZ36	A5WJC0	C6DMF2	P65373	A1KFB4	C1AFM9
P65314	A5TZ42	A5WJC7	C6DMF3	P65375	A1KFB5	C1AFP5
P0A5I8	A5TZ47	A5WJE1	C6DMH9	P0A5K1	A1KFD2	C1AFP8
P65316	A5TZ58	A5WJE5	C6DMI1	P65377	A1KFD8	C1AFR0
P65318	A5TZ71	A5WJG1	C6DMM4	P0A5K3	A1KFE3	C1AFR3
P71548	A5TZA8	A5WJG5	C6DMM8	P65381	A1KFF3	C1AFU7
P95211	A5TZB0	A5WJI7	C6DMN0	P69927	A1KFG6	C1AFU8
Q11171	A5TZC4	A5WJI8	C6DMN6	P0A5Y1	A1KFK2	C1AFV7
O53657	A5TZC5	A5WJI9	C6DMP5	P0A5Q3	A1KFK4	C1AFY0
P65372	A5TZC8	A5WJM1	C6DMR1	P0A5Q5	A1KFL8	C1AFY5
P65374	A5TZC9	A5WJM2	C6DMS6	P0A669	A1KFL9	C1AFZ1
P0A5K0	A5TZD2	A5WJM6	C6DMV6	P0CAX7	A1KFM3	C1AFZ4
P65376	A5TZD7	A5WJM9	C6DMV7	P0A4V7	A1KFM4	C1AG06
P0A5K2	A5TZE4	A5WJN3	C6DMV8	P0A619	A1KFM8	C1AG20
P65380	A5TZF8	A5WJP1	C6DMW0	P65420	A1KFN3	C1AG26
P69926	A5TZG2	A5WJR0	C6DMW7	P0A5P9	A1KFP0	C1AG61
P0A5Y0	A5TZH7	A5WJS3	C6DMW8	P65500	A1KFQ4	C1AG72
P0A5Q2	A5TZI1	A5WJS9	C6DMX2	P65564	A1KFQ8	C1AG74
P0A5Q4	A5TZK4	A5WJU8	C6DMZ6	Q7TWR6	A1KFS3	C1AG88
P0A668	A5TZK5	A5WJU9	C6DN31	P59950	A1KFS7	C1AGB5
P0A670	A5TZN6	A5WJW0	C6DN80	P0A5Q7	A1KFV0	C1AGC2
P0A4V6	A5TZN7	A5WJW8	C6DN90	P59949	A1KFV1	C1AGD2
P0A618	A5TZP1	A5WJW9	C6DN95	P0A5Y3	A1KFY2	C1AGF1
P65419	A5TZP4	A5WK39	C6DNB2	P63888	A1KFY3	C1AGF4
P0A5P8	A5TZP8	A5WK42	C6DNC1	Q7TXJ7	A1KFY7	C1AGG2
P65499	A5TZQ6	A5WK45	C6DNC9	P0A609	A1KFZ0	C1AGI4
P65563	A5TZS5	A5WK47	C6DNE4	P66890	A1KFZ4	C1AGI6
P71586	A5TZT0	A5WK48	C6DNF7	Q7VEZ5	A1KG02	C1AGJ7
Q10873	A5TZT9	A5WKA2	C6DNG4	P64792	A1KG22	C1AGL5
P95245	A5TZU5	A5WKE3	C6DNG8	P0A5E2	A1KG27	C1AGR2
Q6MWY5	A5TZW3	A5WKG8	C6DNH3	P64794	A1KG36	C1AGT3
O06411	A5TZW4	A5WKH3	C6DNK0	P66965	A1KG42	C1AGW0
Q79FC6	A5TZX5	A5WKI6	C6DNK4	P66967	A1KG60	C1AGW7
P0A5Q6	A5TZY4	A5WKK1	C6DNK5	P0A5E6	A1KG61	C1AGX4
P96282	A5TZY5	A5WKK4	C6DNN9	P64850	A1KG71	C1AGX7
P15712	A5TZZ8	A5WKK8	C6DNP8	P59980	A1KG80	C1AGY3
O05870	A5U057	A5WKL0	C6DNR9	P63694	A1KG81	C1AH18
P0A5Y2	A5U060	A5WKN8	C6DNS3	P64868	A1KG93	C1AH41
P63887	A5U063	A5WKP6	C6DNS6	P64890	A1KGF1	C1AH72
Q50457	A5U065	A5WKR1	C6DNS7	P59981	A1KGF4	C1AH87
Q50634	A5U066	A5WKR5	C6DNT5	P67223	A1KGF7	C1AH91
P0A608	A5U0C0	A5WKS3	C6DNT9	P67225	A1KGF9	C1AHE7
P71879	A5U0G2	A5WKU9	C6DNV1	P64904	A1KGG0	C1AHF0
P66889	A5U0I8	A5WKV0	C6DNX4	P64906	A1KGL5	C1AHG1
O33220	A5U0J3	A5WKV4	C6DNY2	P67474	A1KGQ7	C1AHH0
O06239	A5U0K6	A5WKV6	C6DNY6	P65822	A1KGT2	C1AHK1
P64791	A5U0M0	A5WKY4	C6DNZ1	P66884	A1KGT7	C1AHK3
P0A5E1	A5U0M3	A5WKZ2	C6DNZ4	P67668	A1KGV0	C1AHK9
P64793	A5U0M6	A5WL10	C6DNZ7	P67131	A1KGW5	C1AHP4
P66964	A5U0N5	A5WL29	C6DP05	P65008	A1KGW7	C1AHQ8
P66966	A5U0Q5	A5WL32	C6DP11	P59984	A1KGX0	C1AHR1
P0A5E5	A5U0R3	A5WL38	C6DP21	P65026	A1KGX9	C1AHU3
Q10620	A5U0S7	A5WL51	C6DP24	P65030	A1KGZ9	C1AHU8
Q11013	A5U0T1	A5WL53	C6DP30	P63912	A1KH07	C1AHU9
P64849	A5U0U0	A5WL62	C6DP31	P0A607	A1KH20	C1AHV3
P71766	A5U0W7	A5WL86	C6DP32	P65048	A1KH24	C1AHV4
P63693	A5U0W8	A5WL89	C6DP37	P64696	A1KH33	C1AHV6
P64867	A5U0X2	A5WL97	C6DP38	P64698	A1KH39	C1AI31
P71993	A5U0X4	A5WLA9	C6DP39	P64732	A1KH59	C1AI35
O07220	A5U103	A5WLC1	C6DP43	P64744	A1KH60	C1AI37
P64889	A5U111	A5WLE1	C6DP59	P64746	A1KH65	C1AI43
Q50618	A5U130	A5WLF7	C6DP79	P64758	A1KH68	C1AI52
Q50593	A5U149	A5WLI5	C6DPB3	P64782	A1KH97	C1AI68
P67222	A5U152	A5WLI6	C6DPD9	O31095	A1KHA5	C1AI79
P67224	A5U159	A5WLJ5	C6DPH1	O53797	A1KHC4	C1AIA7
P64903	A5U184	A5WLK3	C6DPI4	Q7TTP7	A1KHE4	C1AIA8
P64905	A5U1B0	A5WLL1	C6DPK0	Q7TVD2	A1KHE7	C1AIB0
Q10683	A5U1B3	A5WLL2	C6DPL4	Q7TVF4	A1KHF4	C1AIB6
Q10689	A5U1C1	A5WLM9	C6DPL9	Q7TVF6	A1KHH9	C1AIB7
P67473	A5U1D5	A5WLN7	C6DPM7	Q7TVI7	A1KHK2	C1AIB8
P65821	A5U1E3	A5WLP2	C6DPN9	Q7TVK2	A1KHK5	C1AIB9
P66883	A5U1G2	A5WLQ2	C6DPR4	Q7TVL8	A1KHL3	C1AIC6
Q50687	A5U1H7	A5WLQ6	C6DPS2	Q7TVM2	A1KHN6	C1AID5
P67667	A5U1K5	A5WLR4	C6DPU5	Q7TVM3	A1KHQ5	C1AIE5
Q50673	A5U1K6	A5WLS4	C6DPY4	Q7TVM8	A1KHU7	C1AIF8
P95241	A5U1L5	A5WLT2	C6DPZ1	Q7TVN2	A1KHU8	C1AIH1
P67130	A5U1M3	A5WLU8	C6DPZ8	Q7TVR4	A1KHV7	C1AIH8
P65007	A5U1N1	A5WLU9	C6DQ20	Q7TVT8	A1KHW5	C1AII1
Q50636	A5U1N2	A5WLV0	C6DQ25	Q7TVU2	A1KHX3	C1AII6
P65025	A5U1P9	A5WLV1	C6DQ91	Q7TVU5	A1KHX4	C1AIL1
P65029	A5U1Q7	A5WLV4	C6DQA2	Q7TVV1	A1KHY9	C1AIL5
Q50622	A5U1R2	A5WLV5	C6DQA3	Q7TVW0	A1KHZ7	C1AIQ1
P63911	A5U1S6	A5WLW2	C6DQA6	Q7TVX2	A1KI02	C1AIQ7
P71973	A5U1T3	A5WLW3	C6DQA7	Q7TVY2	A1KI16	C1AIQ8
P0A606	A5U1U2	A5WLX2	C6DQB1	Q7TVZ0	A1KI23	C1AIQ9
O07187	A5U1V0	A5WLX7	C6DQB7	Q7TVZ6	A1KI32	C1AIR4
O33351	A5U1W6	A5WLZ3	C6DQB8	Q7TVZ7	A1KI40	C1AIR5
P65047	A5U1W7	A5WM27	C6DQC1	Q7TVZ8	A1KI55	C1AIR6
Q8VJ51	A5U1W8	A5WM53	C6DQC2	Q7TVZ9	A1KI56	C1AIS0
P64695	A5U1W9	A5WM59	C6DQC3	Q7TW05	A1KI57	C1AIT7
P64697	A5U1X2	A5WM91	C6DQG6	Q7TW07	A1KI58	C1AIV4
P64731	A5U1X3	A5WM94	C6DQH0	Q7TW08	A1KI61	C1AIY1
P64743	A5U1Y0	A5WMA1	C6DQH1	Q7TW31	A1KI62	C1AIY4
P64745	A5U1Y1	A5WMA2	C6DQI1	Q7TW45	A1KI69	C1AJ13
P64757	A5U1Z0	A5WMB6	C6DQI2	Q7TW56	A1KI70	C1AJ37
P64781	A5U1Z5	A5WMB7	C6DQI7	Q7TW58	A1KI79	C1AJ49
O05302	A5U211	A5WMC3	C6DQK3	Q7TW62	A1KI84	C1AJ73
O05310	A5U243	A5WMG0	C6DQK9	Q7TWD2	A1KIA0	C1AJ86
O05436	A5U270	A5WMG1	C6DQL0	Q7TWD4	A1KID3	C1AJE2
O05458	A5U278	A5WMG9	C6DQL4	Q7TWD5	A1KIF8	C1AJF1
O05461	A5U2B0	A5WMH1	C6DQQ1	Q7TWD9	A1KIG5	C1AJJ4
O05592	A5U2B3	A5WML0	C6DQS2	Q7TWE0	A1KIJ7	C1AJJ5
O05594	A5U2C0	A5WML2	C6DQS4	Q7TWE5	A1KIK0	C1AJJ6
O05775	A5U2C1	A5WMM5	C6DQS5	Q7TWH1	A1KIK7	C1AJJ7
O05816	A5U2D5	A5WMM8	C6DQY0	Q7TWH3	A1KIK8	C1AJJ8
O05854	A5U2D7	A5WMR5	C6DQZ0	Q7TWI4	A1KIM2	C1AJL7
O05859	A5U2E3	A5WMT6	C6DR21	Q7TWJ8	A1KIM4	C1AJM7
O05862	A5U2I1	A5WMU1	C6DR24	Q7TWK4	A1KIN0	C1AJM8
O05919	A5U2I2	A5WMW9	C6DR40	Q7TWK6	A1KIR7	C1AJN1
O06133	A5U2J0	A5WMZ8	C6DR66	Q7TWN2	A1KIR8	C1AJQ1
O06138	A5U2J2	A5WN06	C6DR68	Q7TWN9	A1KIS6	C1AJQ2
O06155	A5U2N0	A5WN10	C6DR69	Q7TWP5	A1KIS8	C1AJQ4
O06177	A5U2N2	A5WN54	C6DR71	Q7TWP8	A1KIV3	C1AJR0
O06205	A5U2P5	A5WN74	C6DR79	Q7TWR3	A1KIV5	C1AJR1
O06231	A5U2P8	A5WN80	C6DR86	Q7TWS7	A1KIW8	C1AJR3
O06237	A5U2S3	A5WNC3	C6DR87	Q7TWU9	A1KIX1	C1AJW9
O06252	A5U2V1	A5WNC4	C6DRC9	Q7TX00	A1KIY7	C1AJX0
O06295	A5U2X2	A5WND1	C6DRE9	Q7TX06	A1KIZ7	C1AJY7
O06316	A5U2X7	A5WND6	C6DRH4	Q7TX09	A1KJ11	C1AJZ3
O06319	A5U305	A5WND8	C6DRH5	Q7TX15	A1KJ32	C1AJZ8
O06349	A5U335	A5WND9	C6DRH6	Q7TX21	A1KJ37	C1AK08
O06354	A5U344	A5WNE1	C6DRH7	Q7TX46	A1KJ65	C1AK20
O06355	A5U348	A5WNG5	C6DRH8	Q7TX95	A1KJ93	C1AK56
O06380	A5U3C1	A5WNI1	C6DRK7	Q7TXB1	A1KJA2	C1AK58
O06384	A5U3G3	A5WNI4	C6DRK8	Q7TXB9	A1KJA6	C1AK72
O06392	A5U3G4	A5WNK5	C6DRL1	Q7TXD7	A1KJH5	C1AK73
O06416	A5U3H1	A5WNK9	C6DRN1	Q7TXE4	A1KJH6	C1AK77
O06425	A5U3H7	A5WNL0	C6DRN2	Q7TXE7	A1KJK6	C1AK78
O06555	A5U3H9	A5WNL5	C6DRP1	Q7TXF9	A1KJK7	C1AK82
O06556	A5U3I0	A5WNN1	C6DRP2	Q7TXG5	A1KJL5	C1AK87
O06567	A5U3I1	A5WNN5	C6DRP4	Q7TXG8	A1KJM1	C1AK94
O06582	A5U3I2	A5WNN6	C6DRY2	Q7TXI5	A1KJM3	C1AKA8
O06624	A5U3K8	A5WNP6	C6DRY6	Q7TXM5	A1KJM4	C1AKB2
O06630	A5U3M4	A5WNP7	C6DRZ5	Q7TXN5	A1KJM5	C1AKC7
O06823	A5U3M7	A5WNQ1	C6DS23	Q7TXP0	A1KJM6	C1AKD1
O06825	A5U3P8	A5WNU5	C6DS52	Q7TXQ7	A1KJQ3	C1AKF3
O06934	A5U3Q2	A5WNU6	C6DS57	Q7TXR3	A1KJR9	C1AKF4
O07175	A5U3Q9	A5WNU7	C6DS72	Q7TXR4	A1KJU4	C1AKF5
O07180	A5U3R8	A5WNV0	C6DS73	Q7TXU9	A1KJU8	C1AKI6
O07202	A5U3S5	A5WNV1	C6DS85	Q7TXV9	A1KJV5	C1AKI7
O07219	A5U3S9	A5WNV2	C6DS86	Q7TXW1	A1KJX1	C1AKJ1
O07222	A5U3T0	A5WNV7	C6DSA2	Q7TXX7	A1KJX5	C1AKJ4
O07236	A5U3U0	A5WNW0	C6DSA8	Q7TY09	A1KJX6	C1AKJ8
O07242	A5U3U1	A5WNW1	C6DSB3	Q7TY14	A1KJY6	C1AKK6
O07246	A5U3U5	A5WNW3	C6DSC4	Q7TY28	A1KJY7	C1AKM5
O07255	A5U3Y8	A5WNW4	C6DSD7	Q7TY42	A1KJZ1	C1AKN0
O07414	A5U3Y9	A5WP20	C6DSD8	Q7TY48	A1KK87	C1AKN9
O07415	A5U3Z0	A5WP25	C6DSH1	Q7TY52	A1KK92	C1AKP5
O07416	A5U3Z3	A5WP46	C6DSH3	Q7TY55	A1KKA6	C1AKR3
O07417	A5U3Z4	A5WP53	C6DSI7	Q7TY89	A1KKB4	C1AKR4
O07726	A5U3Z5	A5WP59	C6DSI8	Q7TY90	A1KKC0	C1AKS4
O07741	A5U400	A5WP90	C6DSI9	Q7TY96	A1KKC6	C1AKT3
O07746	A5U404	A5WPB0	C6DSJ2	Q7TYA0	A1KKC7	C1AKT4
O07750	A5U405	A5WPB6	C6DSJ3	Q7TYB4	A1KKF9	C1AKU6
O07762	A5U408	A5WPE1	C6DSJ6	Q7TYC1	A1KKI1	C1AL04
O07774	A5U409	A5WPF2	C6DSK1	Q7TYC2	A1KKI7	C1AL07
O07775	A5U466	A5WPG0	C6DSL4	Q7TYC3	A1KKL2	C1AL10
O07784	A5U471	A5WPG4	C6DSQ1	Q7TYE3	A1KKM3	C1AL12
O07808	A5U4A0	A5WPH8	C6DSQ4	Q7TYE6	A1KKN2	C1AL13
O33188	A5U4A6	A5WPJ4	C6DSR7	Q7TYH1	A1KKN6	C1AL68
O33192	A5U4A8	A5WPK6	C6DSR9	Q7TYJ9	A1KKR6	C1ALB0
O33224	A5U4E2	A5WPM4	C6DSV9	Q7TYN4	A1KKS8	C1ALD4
O33234	A5U4G4	A5WPN3	C6DSW1	Q7TYP4	A1KKU7	C1ALD9
O33323	A5U4H1	A5WPN8	C6DSW9	Q7TYP8	A1KKV7	C1ALF2
O33326	A5U4J8	A5WPP4	C6DSX0	Q7TYS1	A1KKW3	C1ALG7
O33346	A5U4K9	A5WPP7	C6DSZ6	Q7TYS2	A1KKX0	C1ALG9
O33359	A5U4L7	A5WPP8	C6DT10	Q7TYS3	A1KKX3	C1ALH2
O33363	A5U4M2	A5WPQ6	C6DT14	Q7TYT1	A1KKX5	C1ALI1
O50383	A5U4Q2	A5WPR4	C6DT30	Q7TYU1	A1KKY5	C1ALK1
O50416	A5U4R6	A5WPT1	C6DT58	Q7TZ25	A1KKZ3	C1ALK9
O50430	A5U4T5	A5WPU3	C6DT59	Q7TZ65	A1KL15	C1ALM2
O50440	A5U4U7	A5WPU7	C6DT92	Q7TZA2	A1KL27	C1ALM6
O50459	A5U4V3	A5WPV5	C6DT93	Q7TZA3	A1KL31	C1ALN5
O53168	A5U4W0	A5WPV6	C6DT97	Q7TZB3	A1KL40	C1ALP1
O53169	A5U4W5	A5WPV9	C6DTA0	Q7TZC6	A1KL41	C1ALR1
O53177	A5U4W7	A5WPW3	C6DTA4	Q7TZD2	A1KL44	C1ALR2
O53223	A5U4X3	A5WPY2	C6DTB2	Q7TZD6	A1KL56	C1ALR7
O53246	A5U4X6	A5WPZ1	C6DTE3	Q7TZG3	A1KL66	C1ALS0
O53253	A5U4Y4	A5WQ04	C6DTE9	Q7TZH3	A1KL79	C1ALU9
O53263	A5U506	A5WQ10	C6DTF0	Q7TZH5	A1KL84	C1ALV7
O53280	A5U518	A5WQ19	C6DTG4	Q7TZI1	A1KL95	C1ALX7
O53283	A5U522	A5WQ64	C6DTG5	Q7TZI7	A1KLE6	C1ALZ7
O53291	A5U530	A5WQ97	C6DTH2	Q7TZI8	A1KLI1	C1AM00
O53315	A5U531	A5WQC5	C6DTH5	Q7TZL9	A1KLL1	C1AM07
O53340	A5U534	A5WQC7	C6DTK8	Q7TZM0	A1KLL4	C1AM32
O53368	A5U538	A5WQF1	C6DTL4	Q7TZS6	A1KLP0	C1AM55
O53380	A5U559	A5WQF2	C6DTP2	Q7TZT3	A1KLP1	C1AM58
O53383	A5U569	A5WQG0	C6DTR6	Q7TZV6	A1KLP2	C1AM67
O53423	A5U583	A5WQH1	C6DTS1	Q7TZV9	A1KLP9	C1AM90
O53444	A5U588	A5WQJ3	C6DTT0	Q7TZW9	A1KLR0	C1AMA9
O53485	A5U597	A5WQJ5	C6DTT6	Q7TZZ7	A1KLT3	C1AMF1
O53489	A5U5E6	A5WQJ6	C6DTV6	Q7TZZ8	A1KLT5	C1AMF2
O53505	A5U5I3	A5WQK4	C6DTV7	Q7U027	A1KLT6	C1AMG1
O53516	A5U5L3	A5WQK6	C6DTW8	Q7U029	A1KLU5	C1AMG9
O53527	A5U5L6	A5WQK7	C6DTX6	Q7U031	A1KLU7	C1AMH7
O53538	A5U5P2	A5WQL5	C6DTX7	Q7U060	A1KLU8	C1AMH8
O53541	A5U5P3	A5WQL6	C6DTY5	Q7U075	A1KLU9	C1AMJ5
O53542	A5U5Q1	A5WQP3	C6DTZ1	Q7U083	A1KLV8	C1AMK3
O53581	A5U5R3	A5WQS1	C6DU58	Q7U092	A1KLV9	C1AMK8
O53608	A5U5T5	A5WQS5	C6DU74	Q7U0B0	A1KLY9	C1AMM2
O53638	A5U5T7	A5WQS9	C6DU79	Q7U0C3	A1KM06	C1AMM9
O53654	A5U5T8	A5WQT7	C6DU88	Q7U0D6	A1KM10	C1AMN8
O53695	A5U5U7	A5WQT8	C6DU89	Q7U0E0	A1KM14	C1AMP6
O53716	A5U5U9	A5WQV3	C6DU96	Q7U0E7	A1KM22	C1AMR1
O53718	A5U5V0	A5WQX3	C6DU97	Q7U0G0	A1KM23	C1AMR2
O53740	A5U5V9	A5WQY0	C6DUA0	Q7U0G8	A1KM38	C1AMR3
O53762	A5U5W0	A5WR17	C6DUA2	Q7U0H6	A1KM59	C1AMR4
O53780	A5U5Y9	A5WR32	C6DUA3	Q7U0I4	A1KM67	C1AMR7
O53782	A5U620	A5WR35	C6DUB9	Q7U0I5	A1KM81	C1AMR8
O53787	A5U624	A5WR47	C6DUC7	Q7U0M3	A1KMA8	C1AMS5
O53788	A5U628	A5WR50	C6DUD6	Q7U0N8	A1KMC4	C1AMS6
O53829	A5U636	A5WR86	C6DUE4	Q7U0Q4	A1KMC7	C1AMT5
O53846	A5U637	A5WR87	C6DUE8	Q7U0R1	A1KMD9	C1AMU0
O53850	A5U652	A5WR96	C6DUE9	Q7U0T4	A1KME2	C1AMV6
O53859	A5U673	A5WRA5	C6DUF8	Q7U0V3	A1KMH6	C1AMY8
O53879	A5U681	A5WRB8	C6DUG3	Q7U0W0	A1KMH7	C1AN13
O53924	A5U6B9	A5WRC3	C6DUH2	Q7U0W8	A1KMI6	C1AN21
O53945	A5U6D4	A5WRC6	C6DUI5	Q7U0Z8	A1KMK9	C1AN53
O53953	A5U6D7	A5WRC8	C6DUI8	Q7U101	A1KML4	C1AN56
O53963	A5U6E9	A5WRD1	C6DUJ1	Q7U104	A1KML8	C1AN63
O53969	A5U6F2	A5WRE3	C6DUJ3	Q7U128	A1KMM0	C1AN64
O53970	A5U6I5	A5WRF7	C6DUJ4	Q7U146	A1KMM3	C1AN78
O53971	A5U6I6	A5WRG3	C6DUQ0	Q7U155	A1KMN5	C1AN80
O53974	A5U6J5	A5WRJ7	C6DUU2	Q7U158	A1KMP9	C1AN86
O53975	A5U6L8	A5WRK9	C6DUX4	Q7U161	A1KMQ5	C1ANC3
O53976	A5U6M3	A5WRL1	C6DUX5	Q7U175	A1KMU0	C1ANC4
O69623	A5U6M7	A5WRM5	C6DUY3	Q7U186	A1KMW7	C1AND2
O69624	A5U6N0	A5WRQ2	C6DUZ1	Q7U189	A1KMZ4	C1AND4
O69626	A5U6N3	A5WRR9	C6DV00	Q7U1B1	A1KN01	C1ANF9
O69632	A5U6P6	A5WRT7	C6DV01	Q7U1H1	A1KN11	C1ANG1
O69633	A5U6R0	A5WRU0	C6DV30	Q7U1H2	A1KN30	C1ANH4
O69634	A5U6R6	A5WRU8	C6DV46	Q7U1H6	A1KN33	C1ANH7
O69636	A5U6V3	A5WRX0	C6DV66	Q7U1H9	A1KN41	C1ANJ3
O69643	A5U6Y2	A5WRX2	C6DV78	Q7U1M1	A1KN63	C1ANK3
O69651	A5U710	A5WRY3	C6DV90	Q7U1N2	A1KN65	C1ANL7
O69661	A5U718	A5WS01	C6DV98	Q7U1N3	A1KN76	C1ANN8
O69673	A5U728	A5WS72	C6DVA1	Q7U1P2	A1KN94	C1ANP3
O69684	A5U747	A5WSA0	C6DVA4	Q7U1Q1	A1KNE1	C1ANS1
O69694	A5U750	A5WSA7	C6DVA9	Q7U1Q2	A1KNG2	C1ANU9
O69699	A5U758	A5WSB4	C6DVC2	Q7U1R7	A1KNI9	C1ANV8
O69725	A5U780	A5WSC4	C6DVD7	Q7U1S1	A1KNJ6	C1ANW2
O86336	A5U782	A5WSF9	C6DVE0	Q7U1S8	A1KNK3	C1AP31
O86337	A5U793	A5WSI2	C6DVG2	Q7U1U8	A1KNK6	C1AP32
O86339	A5U7B1	A5WSL3	C6DVI0	Q7U1V5	A1KNL2	C1AP71
O86365	A5U7F2	A5WSM9	C6DVJ1	Q7U1V8	A1KNR9	C1AP72
O86367	A5U7G1	A5WSP8	C6DVJ3	Q7U1W1	A1KNV0	C1AP80
O86370	A5U7I1	A5WSQ1	C6DVL6	Q7U1Y7	A1KP03	C1AP86
P71618	A5U7L1	A5WSR4	C6DVM4	Q7U215	A1KP21	C1AP88
P71619	A5U7L8	A5WSS6	C6DVM7	Q7U220	A1KP24	C1AP89
P71652	A5U7M5	A5WSV8	C6DVR1	Q7U223	A1KP35	C1AP90
P71655	A5U7M8	A5WSW0	C6DVS1	Q7U227	A1KP47	C1AP91
P71707	A5U7N4	A5WT22	C6DVS3	Q7U231	A1KP78	C1APB8
P71740	A5U7R8	A5WT25	C6DVT7	Q7U232	A1KP80	C1APD4
P71750	A5U7U1	A5WT57	C6DVU4	Q7U245	A1KP86	C1APD7
P71755	A5U7X2	A5WT61	C6DVU7	Q7U246	A1KPC2	C1APF9
P71804	A5U7Z1	A5WT62	C6DVW7	Q7U277	A1KPD6	C1APG3
P71829	A5U805	A5WT66	C6DVY5	Q7U288	A1KPD9	C1APG4
P71894	A5U808	A5WT67	C6DVZ3	Q7U298	A1KPH1	C1APH0
P71965	A5U818	A5WT69	C6DW31	Q7U2A2	A1KPH6	C1API6
P71969	A5U828	A5WTE1	C6DW48	Q7U2A8	A1KPH7	C1APJ0
P72062	A5U863	A5WTE5	C6DW78	Q7U2C4	A1KPI1	C1APJ1
P94983	A5U864	A5WTE7	C6DW93	Q7U2C5	A1KPI2	C1APK0
P95002	A5U870	A5WTF3	C6DW95	Q7U2H7	A1KPI4	C1APK1
P95080	A5U8B1	A5WTG2	C6DWA8	Q7U2H8	A1KPQ8	C1APK5
P95091	A5U8C5	A5WTH8	C6DWE3	Q7U2H9	A1KPR2	C1APP7
P95123	A5U8C8	A5WTJ0	C6DWE9	Q7U2I5	A1KPR4	C1APQ0
P95206	A5U8G1	A5WTJ4	C6DWF6	Q7U2I7	A1KPS0	C1APQ1
P95207	A5U8G6	A5WTM1	C6DWF8	Q7U2I8	A1KPS9	C1APQ3
P95237	A5U8G7	A5WTM2	C6DWG2	Q7U2K5	A1KPU5	C1APQ4
P95238	A5U8H1	A5WTM4	C6DWG3	Q7U2K8	A1KPV6	C1APW1
P95291	A5U8H2	A5WTN0	C6DWG6	Q7U2L8	A1KPY4	C1APW6
P96229	A5U8H4	A5WTN1	C6DWJ2	Q7U2N5	A1KPY5	C1APY7
P96247	A5U8P7	A5WTN2	C6DWK1	Q7U2N6	A1KPY7	C1APZ3
P96257	A5U8Q1	A5WTN5	C6DWM0	Q7U2N7	A1KPZ3	C1APZ9
P96264	A5U8Q3	A5WTP2	C6DWM8	Q7U2N8	A1KPZ4	C1AQ00
P96408	A5U8Q9	A5WTQ0	C6DWQ7	Q7U2N9	A1KPZ5	C1AQ32
P96409	A5U8R8	A5WTQ8	C6DWQ9	Q7U2S9	A1KPZ7	C1AQ54
P96411	A5U8U7	A5WTS2	C6DWU8	Q7U2T9	A1KQ04	C1AQ60
P96418	A5U8V1	A5WTT5	C6DWW0	Q7U2X9	A1KQ13	C1AQ85
P96419	A5U8X8	A5WTU5	C6DWW3	Q7U2Y6	A1KQ23	C1AQ96
P96854	A5U8Y1	A5WTV0	C6DWW5	Q7U306	A1KQ36	C1AQA5
P96860	A5U8Y7	A5WTX7	C6DWW9	Q7VEM0	A1KQ49	C1AQA9
P96872	A5U8Y8	A5WTY1	C6DWY9	Q7VEM2	A1KQ56	C1AQD9
P96903	A5U8Y9	A5WTY2	C6DWZ8	Q7VEM4	A1KQ59	C1AQF1
Q50584	A5U8Z2	A5WU15	C6DX07	Q7VEM9	A1KQ64	C1AQH0
Q50681	A5U8Z9	A5WU16	C6DX08	Q7VEN8	A1KQ90	C1AQI0
Q6MWX4	A5U907	A5WU22	C6DX44	Q7VEP4	A1KQ94	C1AQI6
Q6MWX5	A5U917	A5WU23	C6DX47	Q7VEQ0	A1KQD0	C1AQJ3
Q6MWY0	A5U930	A5WU24	C6DX59	Q7VEQ1	A1KQD6	C1AQJ6
Q6MX34	A5U943	A5WU29	C6DX62	Q7VER2	A1KQD7	C1AQJ8
Q79F96	A5U950	A5WU30	C6DX74	Q7VER9	A1KQE3	C1AQK8
Q79FA5	A5U954	A5WU31	C6DX82	Q7VES3	A1KQE4	C1AQL6
Q79FB3	A5U959	A5WU35	C6DXA3	Q7VES5	A1KQE5	C1AQN8
Q79FP3	A5U986	A5WU51	C6DXD1	Q7VEV5	A1KQE9	C1AQQ0
Q79FT3	A5U990	A5WU70	C6DXD8	Q7VEY5	A1KQG6	C1AQQ4
Q79FV8	A5U9C5	A5WUA4	C6DXE5	Q7VEZ4	A1KQI3	C1AQR3
Q79FZ8	A5U9D1	A5WUD0	C6DXF5	Q7VF01	A1KQL0	C1AQR4
Q79FZ9	A5U9D2		C6DXJ0		A1KQL3	C1AQR7
Q7D589	A5U9D3				A1KQN8	C1AQS9
Q7D5E7	A5U9D8					C1AQT9
Q7D6F2	A5U9D9					C1AQV2
Q7D6M3	A5U9E0					C1AQV7
Q7D724	A5U9E4					C1AQW8
Q7D8J9	A5U9G0
Q7D8L5	A5U9H7
Q7D8Y6	A5U9L1
Q7D9D5	A5U9L4
Q7DA74	A5U9N7
